# Supplementary material
Source: PubMed Central journal article supplement (PMC5910801)
Supplement: pnas.201700292SI.pdf [file pnas.201700292SI.pdf]

# Supporting Information

Zhao et al. 10.1073/pnas.1700292114

## SI Materials and Methods

**Soil Sampling.** The soil samples collected from the designated sampling sites used a process of composite sampling. At each sampling site, five soil subsamples (one was exactly coincided with the designated location, and the other four were at a distance of 5 m from the designated location in a shape of cross) were taken using a soil-sampling spade, and then fully mixed. After quartering, about 1 kg of the composite sample was obtained and placed into a plastic bag and taken back for laboratory analyses.

**Bootstrapping Estimates of Area-Weighted Mean SOC Stock and Its Change.** To obtain a robust estimate of SOC stock and its change, bootstraps with 10,000 times of repeat sampling were first applied to the samples of each county in 1980 and 2011, respectively, and then the area-weighted mean SOC stocks for each county in the two dates were calculated 10,000 times using the bootstrapped samples, respectively. Changes in the SOC stock were estimated by random subtraction of the 10,000 SOC stock estimates in 1980 and 10,000 estimates in 2011. The median (50% percentile) of the 10,000 estimates was used to represent the area-weighted mean of SOC stock and its change in the county, and the 2.5% and 97.5% percentile were used to derive the 95% confidence interval of the estimates. For each region, area-weighted SOC stock and its changes were calculated 10,000 times, based on the random permutation of 10,000 SOC estimates for each county within the region and the soil areas of each corresponding county. The 50%, 2.5%, and 97.5% percentiles were used to

represent the mean, and 95% confidence interval of SOC stock and its change, respectively.

**Estimates of C Input from Crop Resides (Root Plus Straw/Stover).** For a given year of a county, the C input from root ( $C_r$ ) and straw/stover ( $C_s$ ) of a given crop was estimated from the following equations, respectively:

$$C_s = \text{Yield} \times (1 - \text{WC}) / \text{GSratio} \times \text{StrawReturn} \times 0.45 \quad [1]$$

$$C_r = \text{Yield} \times (1 - \text{WC}) / \text{GSratio} \times \text{RSratio} \times 0.45, \quad [2]$$

where Yield ( $t$ ) represents economic yield of the crop as recorded in agricultural census yearbook of the county at the given year, WC represents water content of the economic yield, expressed as a mass fraction (Table S3), and 0.45 is the conversion factor for converting crop biomass to C content (49). GSratio and RSratio represent grain:straw and root:straw of the crop, respectively. The GSratio and RSratio used in this study were estimated from the measurements of dry weight for crop root, straw/stover, and grain of 333 sampled plots across the 58 investigated counties in the sampling campaign in 2011 (Table S4). StrawReturn represents the average return ratio of the crop straw/stover in the county. The average return ratio of straw/stover was estimated from the crop residue management investigation (including beginning year of straw/stover return, duration, area percentage with straw/stover return, and mass percentage of straw/stover return, and so forth) at each corresponding soil sampling site during the sampling campaign in 2011.





**Table S1. SOC stocks and changes in SOC stocks (t C ha<sup>-1</sup>) for the 58 investigated counties across China**

| County              | Predominant cropping system | SOC in 1980 (Mg C ha <sup>-1</sup> ) |        |       | SOC in 2011 (Mg C ha <sup>-1</sup> ) |        |       | Changes in SOC (Mg C ha <sup>-1</sup> ) |        |       |
|---------------------|-----------------------------|--------------------------------------|--------|-------|--------------------------------------|--------|-------|-----------------------------------------|--------|-------|
|                     |                             | Lower                                | Median | Upper | Lower                                | Median | Upper | Lower                                   | Median | Upper |
| East China          |                             |                                      |        |       |                                      |        |       |                                         |        |       |
| Kenli               | W-M; W/C                    | 8.73                                 | 11.31  | 13.50 | 14.95                                | 16.93  | 19.04 | 2.60                                    | 5.66   | 8.88  |
| Laiyang             | W-M; W-P                    | 11.75                                | 12.89  | 13.80 | 19.29                                | 20.58  | 21.88 | 6.11                                    | 7.72   | 9.44  |
| Pingyi              | W-M; W-P                    | 11.42                                | 12.28  | 13.10 | 20.30                                | 21.97  | 23.67 | 7.83                                    | 9.70   | 11.59 |
| Yucheng             | W-M; W/C                    | 9.80                                 | 12.58  | 15.37 | 25.37                                | 26.89  | 28.40 | 11.12                                   | 14.30  | 17.48 |
| Mengcheng           | W-M; W-S; W/C               | 16.60                                | 18.44  | 20.14 | 27.10                                | 29.12  | 31.11 | 8.03                                    | 10.69  | 13.40 |
| Dingyuan            | W-R; W-M                    | 11.10                                | 13.26  | 15.64 | 25.39                                | 27.57  | 29.70 | 11.07                                   | 14.29  | 17.37 |
| Xuancheng           | W-R; R-R; W/C               | 23.31                                | 25.67  | 28.46 | 32.60                                | 35.06  | 37.59 | 5.61                                    | 9.35   | 12.88 |
| Rugao               | W-R; W-M; W-S               | 14.37                                | 15.98  | 17.56 | 21.85                                | 23.10  | 24.42 | 5.07                                    | 7.13   | 9.19  |
| Shuyang             | W-R; W-M; W-S               | 12.91                                | 14.70  | 16.54 | 29.58                                | 31.91  | 34.18 | 14.25                                   | 17.20  | 20.08 |
| Qingpu              | W-R; Rap-R                  | 37.98                                | 43.02  | 48.24 | 37.12                                | 40.07  | 43.03 | -9.10                                   | -2.98  | 2.86  |
| Jinhua              | R-R; Rap-R                  | 26.41                                | 28.67  | 31.15 | 30.47                                | 32.85  | 35.00 | 0.73                                    | 4.15   | 7.27  |
| Tongxiang           | R-R; Rap-R                  | 32.83                                | 38.26  | 43.97 | 25.17                                | 27.32  | 29.58 | -17.10                                  | -10.92 | -5.04 |
| JinXian             | R-R; Rap-R                  | 26.17                                | 28.94  | 32.18 | 38.95                                | 42.29  | 44.93 | 8.86                                    | 13.26  | 17.24 |
| Taihe               | R-R; Rap-R                  | 25.28                                | 30.47  | 35.75 | 37.20                                | 39.95  | 42.80 | 3.58                                    | 9.49   | 15.34 |
| Jianou              | R-R; Rap-R                  | 30.91                                | 38.78  | 46.52 | 42.10                                | 44.65  | 47.18 | -2.71                                   | 5.93   | 14.58 |
| Zhangpu             | R-R; Rap-R                  | 30.85                                | 36.41  | 43.29 | 35.83                                | 38.82  | 41.62 | -5.06                                   | 2.32   | 8.64  |
| North China         |                             |                                      |        |       |                                      |        |       |                                         |        |       |
| Naiman              | M                           | 7.16                                 | 8.81   | 10.47 | 11.35                                | 13.22  | 15.12 | 1.89                                    | 4.42   | 6.92  |
| Wuchuan             | W; Rap                      | 22.38                                | 28.13  | 34.28 | 24.15                                | 25.93  | 27.68 | -8.47                                   | -2.25  | 3.82  |
| Luancheng           | W-M                         | 16.19                                | 17.39  | 18.43 | 31.62                                | 33.43  | 35.20 | 13.96                                   | 16.04  | 18.16 |
| Nanpi               | W-M; W/C                    | 15.33                                | 17.27  | 19.47 | 20.86                                | 22.35  | 23.92 | 2.43                                    | 5.09   | 7.57  |
| Xiangfen            | W-M; M                      | 13.55                                | 18.16  | 23.50 | 23.45                                | 26.23  | 29.05 | 2.09                                    | 8.06   | 13.51 |
| Yuanping            | M                           | 14.89                                | 18.69  | 22.99 | 23.82                                | 28.33  | 33.42 | 3.40                                    | 9.65   | 15.93 |
| Northeast China     |                             |                                      |        |       |                                      |        |       |                                         |        |       |
| Baoqing             | S; M; R                     | 47.66                                | 54.97  | 63.70 | 58.93                                | 66.88  | 75.00 | 0.12                                    | 11.76  | 23.07 |
| Hailun              | S; M; R                     | 69.46                                | 75.90  | 82.55 | 59.74                                | 62.52  | 65.26 | -20.58                                  | -13.40 | -6.52 |
| Lindian             | M; S; R                     | 39.38                                | 42.80  | 46.62 | 37.52                                | 39.00  | 40.58 | -7.91                                   | -3.81  | -0.06 |
| Dunhua              | S; M; R                     | 67.57                                | 76.94  | 86.12 | 65.35                                | 69.60  | 73.96 | -17.37                                  | -7.26  | 2.93  |
| Gongzhuling         | M                           | 27.46                                | 30.26  | 32.91 | 28.51                                | 30.82  | 33.36 | -2.92                                   | 0.58   | 4.26  |
| Yushu               | M; S; R                     | 39.48                                | 42.35  | 45.26 | 37.88                                | 40.52  | 43.51 | -5.63                                   | -1.79  | 2.23  |
| Changtu             | M                           | 19.09                                | 20.93  | 23.02 | 20.51                                | 21.83  | 23.20 | -1.54                                   | 0.90   | 3.25  |
| Fuxin               | M                           | 16.41                                | 18.18  | 19.95 | 18.11                                | 19.40  | 20.72 | -0.95                                   | 1.23   | 3.43  |
| Northwest China     |                             |                                      |        |       |                                      |        |       |                                         |        |       |
| Manasi              | C                           | 18.25                                | 21.52  | 24.62 | 19.17                                | 21.52  | 24.22 | -3.95                                   | 0.04   | 4.21  |
| Tabei               | C                           | 16.76                                | 19.42  | 21.71 | 14.83                                | 16.56  | 18.23 | -5.75                                   | -2.83  | 0.27  |
| Ningxian            | W; M; S                     | 12.76                                | 13.75  | 14.79 | 17.61                                | 18.36  | 19.07 | 3.35                                    | 4.60   | 5.84  |
| Zhuanglang          | W; Rap; M                   | 13.80                                | 14.64  | 15.51 | 18.79                                | 19.73  | 20.67 | 3.81                                    | 5.10   | 6.36  |
| Ledu                | W; Rap                      | 23.21                                | 30.54  | 39.16 | 24.04                                | 26.28  | 28.75 | -13.00                                  | -4.27  | 3.50  |
| Pingluo             | W; M; R                     | 16.12                                | 16.82  | 17.50 | 21.69                                | 23.06  | 24.41 | 4.69                                    | 6.25   | 7.79  |
| Wugong              | W-M; M                      | 16.58                                | 17.47  | 18.34 | 27.49                                | 28.38  | 29.29 | 9.66                                    | 10.92  | 12.18 |
| South Central China |                             |                                      |        |       |                                      |        |       |                                         |        |       |
| Fangcheng           | W-M; W/C                    | 13.91                                | 15.32  | 16.64 | 19.64                                | 20.92  | 22.24 | 3.77                                    | 5.61   | 7.53  |
| Fengqiu             | W-M; W/C                    | 14.98                                | 15.98  | 17.04 | 24.57                                | 26.73  | 29.07 | 8.32                                    | 10.75  | 13.30 |
| Huangchuan          | W-R; Rap-R                  | 18.41                                | 19.96  | 21.51 | 22.59                                | 24.99  | 27.55 | 2.17                                    | 5.06   | 7.98  |
| Yuzhou              | W-M; W/C                    | 12.16                                | 15.11  | 18.62 | 27.43                                | 29.39  | 31.36 | 10.25                                   | 14.27  | 17.82 |
| Xishui              | R-R; Rap-R; W/C             | 18.80                                | 20.57  | 22.35 | 27.71                                | 30.18  | 32.78 | 6.51                                    | 9.59   | 12.81 |
| Guiyang             | R-R; Rap-R                  | 33.29                                | 36.43  | 39.76 | 38.14                                | 42.13  | 46.20 | 0.49                                    | 5.68   | 10.75 |
| Wugang              | R-R                         | 26.50                                | 29.99  | 33.77 | 38.93                                | 41.72  | 44.50 | 7.11                                    | 11.73  | 16.14 |
| Wuming              | R-R; M-R                    | 20.52                                | 22.75  | 25.00 | 31.13                                | 35.17  | 38.70 | 7.81                                    | 12.41  | 16.71 |
| Xingan              | R-R                         | 30.65                                | 34.70  | 38.46 | 34.01                                | 38.26  | 45.12 | -2.43                                   | 3.62   | 11.42 |
| Gaozhou             | R-R                         | 19.83                                | 22.43  | 24.80 | 29.85                                | 31.83  | 34.13 | 6.31                                    | 9.42   | 12.82 |
| Taishan             | R-R                         | 24.97                                | 29.93  | 34.45 | 30.70                                | 33.03  | 35.37 | -2.00                                   | 3.17   | 8.47  |
| Yingde              | R-R                         | 26.06                                | 29.30  | 32.43 | 25.95                                | 28.40  | 31.01 | -4.98                                   | -0.87  | 3.16  |
| Danzhou             | R-R                         | 22.35                                | 27.35  | 32.58 | 19.17                                | 22.40  | 25.37 | -11.13                                  | -5.01  | 0.85  |
| Southwest China     |                             |                                      |        |       |                                      |        |       |                                         |        |       |
| Dazi                | W                           | 32.21                                | 36.21  | 40.22 | 36.04                                | 38.17  | 40.47 | -2.64                                   | 2.01   | 6.55  |
| Guanghan            | W-R                         | 39.12                                | 40.12  | 41.15 | 41.07                                | 43.42  | 45.82 | 0.72                                    | 3.30   | 5.84  |
| Yanting             | W-R; W-M; W/M               | 13.80                                | 15.48  | 17.18 | 26.24                                | 28.05  | 29.89 | 10.09                                   | 12.59  | 15.13 |
| Dianjiang           | W-R; W-M; W/M               | 18.35                                | 19.94  | 21.62 | 20.75                                | 22.55  | 24.52 | 0.11                                    | 2.62   | 5.12  |
| Puding              | Rap-R; W/M                  | 38.28                                | 41.80  | 45.37 | 40.63                                | 44.31  | 48.25 | -2.59                                   | 2.53   | 7.76  |
| Zunyi               | Rap-R; W/M                  | 28.61                                | 33.24  | 37.40 | 32.75                                | 36.23  | 40.02 | -2.49                                   | 3.06   | 8.93  |
| Luliang             | W-R; W-M                    | 29.32                                | 30.39  | 31.47 | 40.26                                | 43.80  | 47.58 | 9.64                                    | 13.41  | 17.24 |
| Luxi                | W-R; W-M                    | 37.54                                | 41.65  | 45.57 | 37.99                                | 41.29  | 44.83 | -5.59                                   | -0.35  | 5.19  |

The "Lower" and "Upper" of SOC stock refer to the 95% confidence intervals of the bootstrap estimates. "-" Represents sequential cropping, and "/" means relay intercropping; C, cotton; M, maize; P, peanut; R, rice; Rap, rapeseeds; S, soybean; W, wheat. If there are multiple crop sequences in a county, they are separated by semicolon and the first crop sequence is the most predominant.
